# Supplementary material
Source: Research Square preprint supplement (doi:10.21203/rs.3.rs-9108201/v1)
Supplement: Supplementary file 2 [file 962a03a588e668271b47f4d6.xlsx]

## Sheet: Sheet1
	Embase <1974 to February 18, 2025>
#	Query	Results
1	exp medical student/	100176
2	exp nursing student/	35506
3	exp resident/	74518
4	exp allied health student/	199
5	("medical student*" or "med student*" or "nurs* student*" or resident* or "allied health student*" or intern* or fellow* or consultant*).ti,ab,kf.	2222495
6	((medical or nurs* or clinic*) adj2 trainee*).ti,ab,kf.	5999
7	1 or 2 or 3 or 4 or 5 or 6	2279262
8	exp cognitive load/	1182
9	(strateg* or plan or policy or policies or management or factor*).ti,ab,kf.	9769214
10	("cognitive load*" adj5 (strateg* or plan or policy or policies or management or factor*)).ti,ab,kf.	201
11	8 and 9	356
12	10 or 11	510
13	7 and 12	110
	https://ovidsp.ovid.com/ovidweb.cgi?T=JS&NEWS=N&PAGE=main&SHAREDSEARCHID=1KgQXS2h91lPMfqfnbUQQkMVULyIcCRdOn3SgAVXP3ydHRJTu3QhUcdw4EmxJYTVr
	Ovid MEDLINE(R) and Epub Ahead of Print, In-Process, In-Data-Review & Other Non-Indexed Citations, Daily and Versions <1946 to February 18, 2025>
#	Query	Results
1	exp Students, Medical/	47825
2	exp Students, Nursing/	33151
3	exp "Internship and Residency"/	64574
4	("medical student*" or "med student*" or "nurs* student*" or resident* or "allied health student* intern*" or fellow* or consultant*).ti,ab,kf.	395941
5	((medical or nurs* or clinic*) adj2 trainee*).ti,ab,kf.	3941
6	or/1-5	455612
7	cognitive load*.ti,ab,kf.	4470
8	(strateg* or plan or policy or policies or management or factor*).ti,ab,kf.	7614917
9	6 and 7 and 8	124
	https://ovidsp.ovid.com/ovidweb.cgi?T=JS&NEWS=N&PAGE=main&SHAREDSEARCHID=Wck9acLUjiRLl8ORxqEMZ4hx1n0Bobsmm6gConYC4kU84XZbE909vBSyLUwdID1e
	Web of Science <Feb 19, 2025>
#	Query	Results
	("medical student*" or "med student*" or "nurs* student*" or resident* or "allied health student*" intern* or fellow* or consultant*) OR ((medical or nurs* or clinic*) NEAR/1 (trainee*)) (Topic) and "cognitive load*" (Topic) and (strateg* or plan or policy or policies or management or factor*) (Topic)	188
	Cinahl <Feb 19, 2025>
#	Query	Limiters/Expanders	Last Run Via	Results
S1	(MH "Students, Medical+")	Expanders - Apply equivalent subjects	Interface - EBSCOhost Research Databases	31666
		Search modes - Proximity	Search Screen - Advanced Search
			Database - CINAHL
S2	(MH "Students, Nursing")	Expanders - Apply equivalent subjects	Interface - EBSCOhost Research Databases	3839
		Search modes - Proximity	Search Screen - Advanced Search
			Database - CINAHL
S3	(MH "Interns and Residents")	Expanders - Apply equivalent subjects	Interface - EBSCOhost Research Databases	11604
		Search modes - Proximity	Search Screen - Advanced Search
			Database - CINAHL
S4	(MH "Internship and Residency")	Expanders - Apply equivalent subjects	Interface - EBSCOhost Research Databases	20748
		Search modes - Proximity	Search Screen - Advanced Search
			Database - CINAHL
S5	("medical student*" or "med student*" or "nurs* student*" or resident* or "allied health student*" intern* or fellow* or consultant*)	Expanders - Apply equivalent subjects	Interface - EBSCOhost Research Databases	18881
		Search modes - Proximity	Search Screen - Advanced Search
			Database - CINAHL
S6	(medical or nurs* or clinic*) N1 trainee*)	Expanders - Apply equivalent subjects	Interface - EBSCOhost Research Databases	1651
		Search modes - Proximity	Search Screen - Advanced Search
			Database - CINAHL
S7	S1 OR S2 OR S3 OR S4 OR S5 OR S6	Expanders - Apply equivalent subjects	Interface - EBSCOhost Research Databases	224.93
		Search modes - Proximity	Search Screen - Advanced Search
			Database - CINAHL
S8	"cognitive load*"	Expanders - Apply equivalent subjects	Interface - EBSCOhost Research Databases	135
		Search modes - Proximity	Search Screen - Advanced Search
			Database - CINAHL
S9	(strateg* or plan or policy or policies or management or factor*)	Expanders - Apply equivalent subjects	Interface - EBSCOhost Research Databases	2846803
		Search modes - Proximity	Search Screen - Advanced Search
			Database - CINAHL
S10	S7 AND S8 AND S9	Expanders - Apply equivalent subjects	Interface - EBSCOhost Research Databases	66
		Search modes - Proximity	Search Screen - Advanced Search
			Database - CINAHL
	Google Scholar and hand-searches, revised <Feb 27, 2026>
#	Query	Results
	(intrinsic cognitive load) OR (extraneous cognitive load) OR (germane cognitive load) AND ((trainee dropout) OR (trainee attrition) OR (trainee persistence) OR (trainee burnout) OR (trainee competency) OR (trainee proficiency) OR (trainee skill acquisition)) AND ((cognitive load theory) OR (working memory) OR (learning) OR (education) OR (training) OR (medical education) OR (postgraduate educatio…	7907
